# Supplementary material for: Facile preparation of CoNi2S4@NiSe nano arrays on compressed nickel foam for high performance flexible supercapacitors
Source: Royal Society of Chemistry journal article supplement (doi:10.1039/c6ra20871a), 2016-01-01
Supplement: c6ra20871a1.pdf [file c6ra20871a1.pdf]

## Supplementary Materials

### Facile Preparing $\text{CoNi}_2\text{S}_4@\text{NiSe}$ Nano Arrays on Compressed Nickel Foam for High Performance Flexible Supercapacitor

Zhonghua Tang, Chunyang Jia\*, Zhongquan Wan, Qianlong Zhou, Xingke Ye and Yucan Zhu

*State Key Laboratory of Electronic Thin Films and Integrated Devices, School of Microelectronics and Solid-State Electronics, University of Electronic Science and Technology of China, Chengdu 610054, P. R. China.*

To further study the cycling stability of supercapacitor based on  $\text{CoNi}_2\text{S}_4@\text{NiSe}@\text{Nickel}$  foam, the galvanostatic charge/discharge for 1200 cycles within 0–0.8 V at a current density of 0.015 A/cm<sup>2</sup> were recorded (Figure S1). It reveals that the supercapacitor can get a high retention between 200 to 1100 cycles, which is identical to the results of the cycling stability by CV.

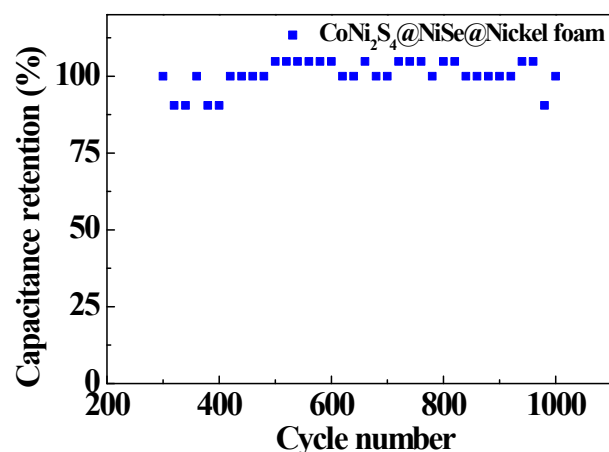

**Figure S1** The cycling performance of  $\text{CoNi}_2\text{S}_4@\text{NiSe}@\text{Nickel}$  foam by GCD

\* Corresponding author. Tel.: +86 28 83201991; Fax: +86 28 83202569. Email: [cyjia@uestc.edu.cn](mailto:cwjia@uestc.edu.cn) (C. Y. Jia)

**Table S1** Electrochemical performance for CoNi<sub>2</sub>S<sub>4</sub>@NiSe@Nickel foam in this study compared with some other reported Ni-based compounds electrodes.

| Electrode structure                                | Specific capacitance       | Cycle stability    | Reference |
|----------------------------------------------------|----------------------------|--------------------|-----------|
| Ni <sub>3</sub> S <sub>2</sub> @CNT                | 480 F/g <sup>[a]</sup>     | 88% (1500)         | 1         |
| NiSe                                               | 1400 F/g <sup>[b]</sup>    | 70% (1000)         | 2         |
| Nanoporous NiO film                                | 1400 F/g <sup>[b]</sup>    | 97.9% (1500)       | 3         |
| NiS@GNS@CNTs                                       | 1621 F/g <sup>[c]</sup>    | 68% (1000)         | 4         |
| Ni(OH) <sub>2</sub> /NiO/Ni                        | 1070 F/g <sup>[d]</sup>    | _____              | 5         |
| Ni(OH) <sub>2</sub> @ Nickel foam                  | 1125 F/g <sup>[b]</sup>    | _____              | 6         |
| NiS@rGO                                            | 579 F/g <sup>[a]</sup>     | 90.96% (1000-2000) | 7         |
| Ni(OH) <sub>2</sub> @ZnO                           | 2028 F/g <sup>[b]</sup>    | 68% (500)          | 8         |
| Nickel sulfides@rGO                                | 1000 F/g <sup>[b]</sup>    | 83.2% (1000)       | 9         |
| Ni <sub>3</sub> S <sub>2</sub> @Nickel foam        | 1100 F/g <sup>[e]</sup>    | 91.4% (1000)       | 10        |
| NiSe                                               | 851.91 F/g <sup>[f]</sup>  | 89.73% (1000)      | This work |
| CoNi <sub>2</sub> S <sub>4</sub> @NiSe nano arrays | 1686.03 F/g <sup>[f]</sup> | 97.59% (1000)      | This work |

Special capacitance at [a] 5 A/g, [b] 10 A/g, [c] 9 A/g, [d] 15 A/g, [e] 6 A/g, [f] 5 mV/s

## REFERENCE

- 1 Zhang, G.; Yu, L.; Hoster, H.; Lou, X. *Nanoscale* 2013, **5**, 877-881.
- 2 Tang, C.; Pu, Z.; Liu, Q.; Asiri, A. M.; Sun, X.; Luo, Y.; He, Y. *ChemElectroChem* 2015, **2**, 1903-1907.
- 3 Liang, K.; Tang, X.; Hu, W. *J. Mater. Chem.* 2012, **22**, 11062-11067.
- 4 Chen, H.; Li, J.; Long, C.; Wei, T.; Ning, G.; Yan, J.; Fan, Z. *J. Mar. Sci. Application* 2014, **13**, 462-466.
- 5 Dai, X.; Chen, D.; Fan, H. Zhong, Y.; Chang, L.; Shao, H.; Wang, J.; Zhang, J.; Cao, C. *Electrochim. Acta*, 2015, **154**, 128-135.
- 6 Hu, B.; Qin, X.; Asiri, A. M. Alamry, K. A.; Al-Youbi, A.; Sun, X. *Electrochim. Acta* 2013, **107** 339-342.
- 7 Yang, J.; Duan, X.; Guo, W. Li, D.; Zhang, H.; Zheng, W. *Nano Energy* 2014, **5**, 74-81.
- 8 Pu, Z.; Liu, Q.; Qusti, A. H. Al-Youbi, A.; Sun, X. *Electrochim. Acta* 2013, **109**, 252-255.
- 9 Xing, Z.; Chu, Q.; Ren, X. Tian, J.; Asiri, A. M.; Alamry, K. A.; Al-Youbi, A.; Sun, X. *Electrochem. Commun.* 2013, **32**, 9-13.
- 10 Huo, H.; Zhao Y.; Xu, C. *J. Mater. Chem. A*, 2014, **2**, 15111-15117
